# Supplementary material for: HSP90B1 regulates autophagy via PI3K/AKT/mTOR signaling, mediating HNSC biological behaviors
Source: PeerJ journal article supplement (doi:10.7717/peerj.17028), 2024-04-05

# Raw data of WB results

**Figure 1. WB for detecting differential expression of HSP90B1 in HNSC cell lines.**

Experimental repetition greater than or equal to 3 times

**Figure 2. WB for detecting apoptosis.**

Experimental repetition 3 times

**Figure 4. WB for PI3K/AKT/mTOR signaling pathway.**

Experimental repetition 3 times

**Figure 4. WB for autophagy.**

Experimental repetition 3 times

Figure 1. WB for detecting differential expression of HSP90B1 in HNSC cell lines.

Experimental repetition greater than or equal to 3 times

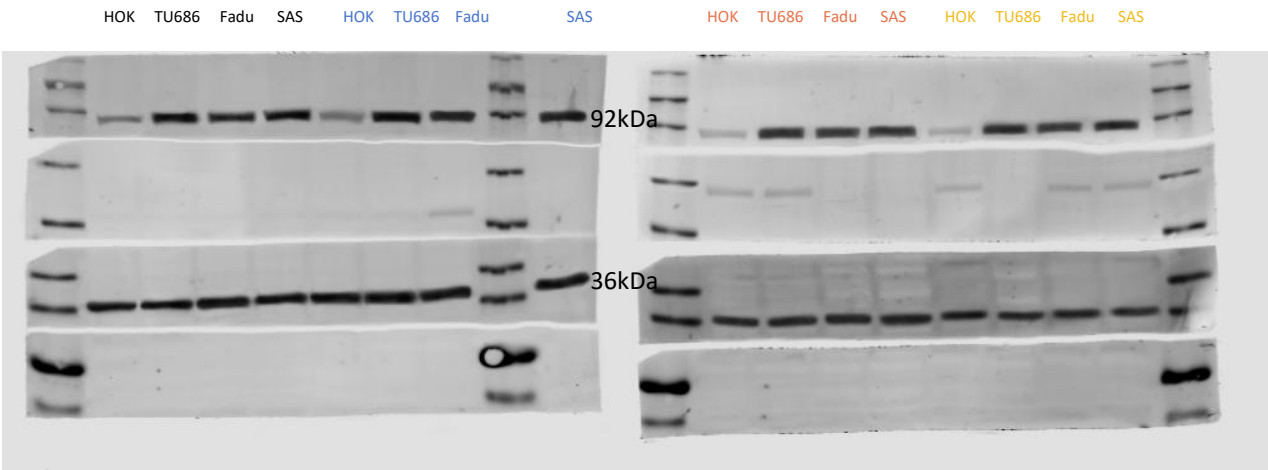

Here is the WB mark.Item No.:SW177-02

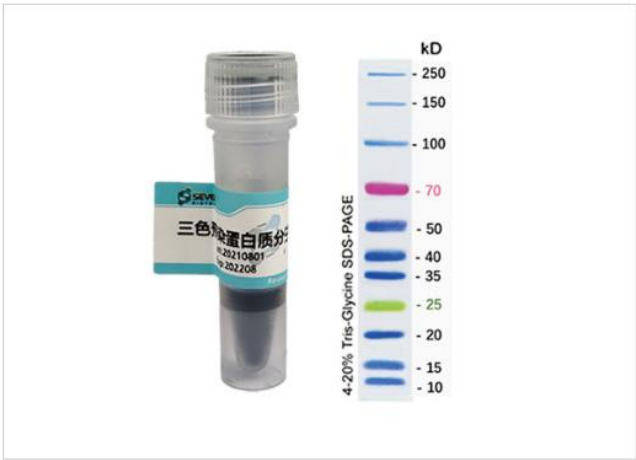

三色预染蛋白质分子量标准(10-250kDa)

品牌: Seven

价格: **¥270** ~~¥380~~

货号规格: 货号: SW177-02 规格: 250uL

购买数量: 1

加入购物车

说明书下载

**Figure 2. WB for detecting apoptosis.**  
SiHSP90B1. Experimental repetition 3 times

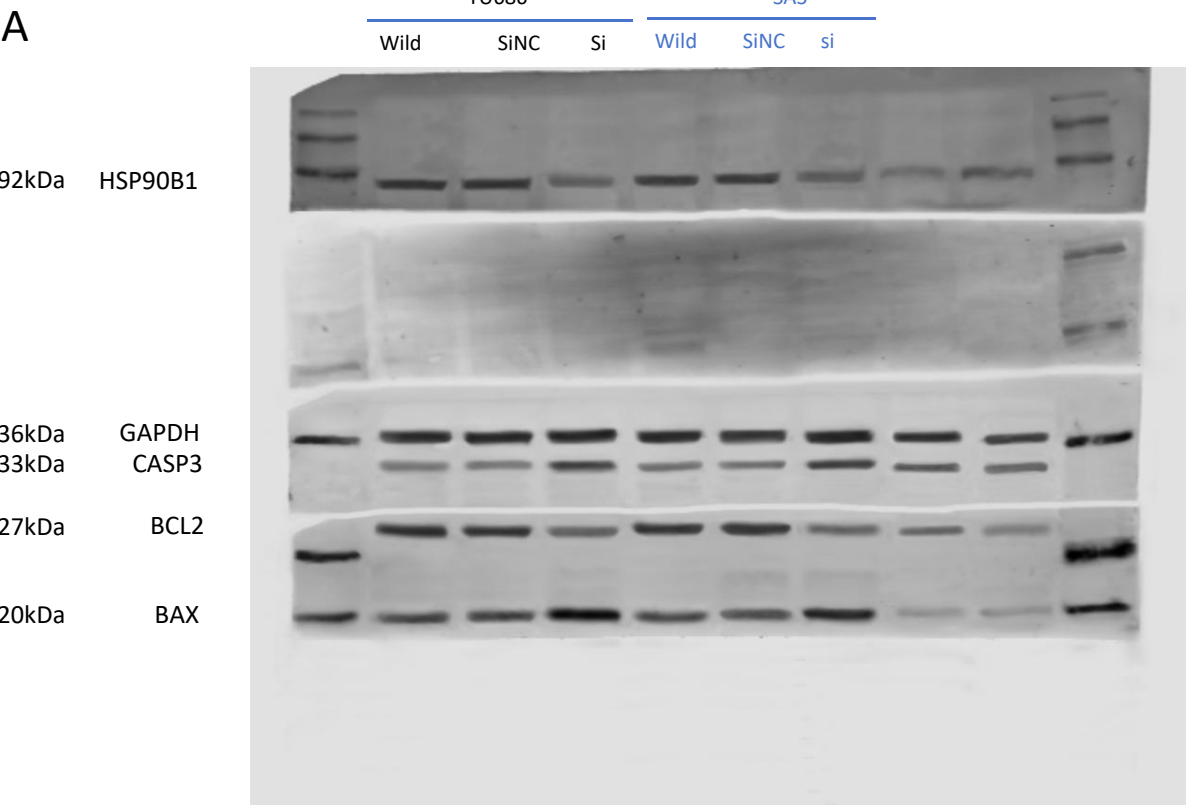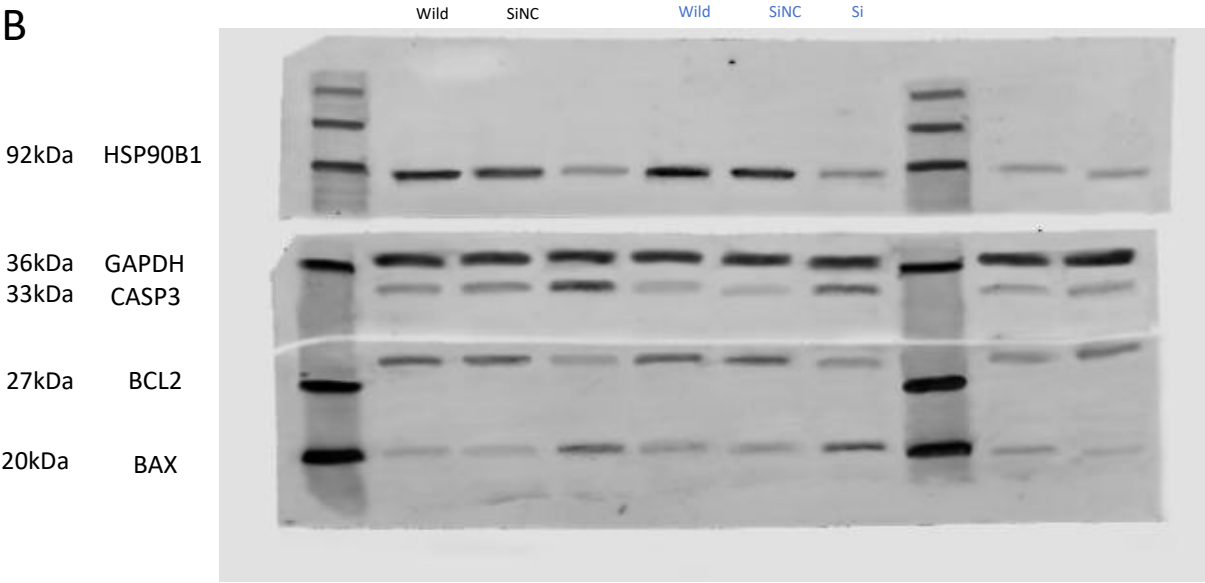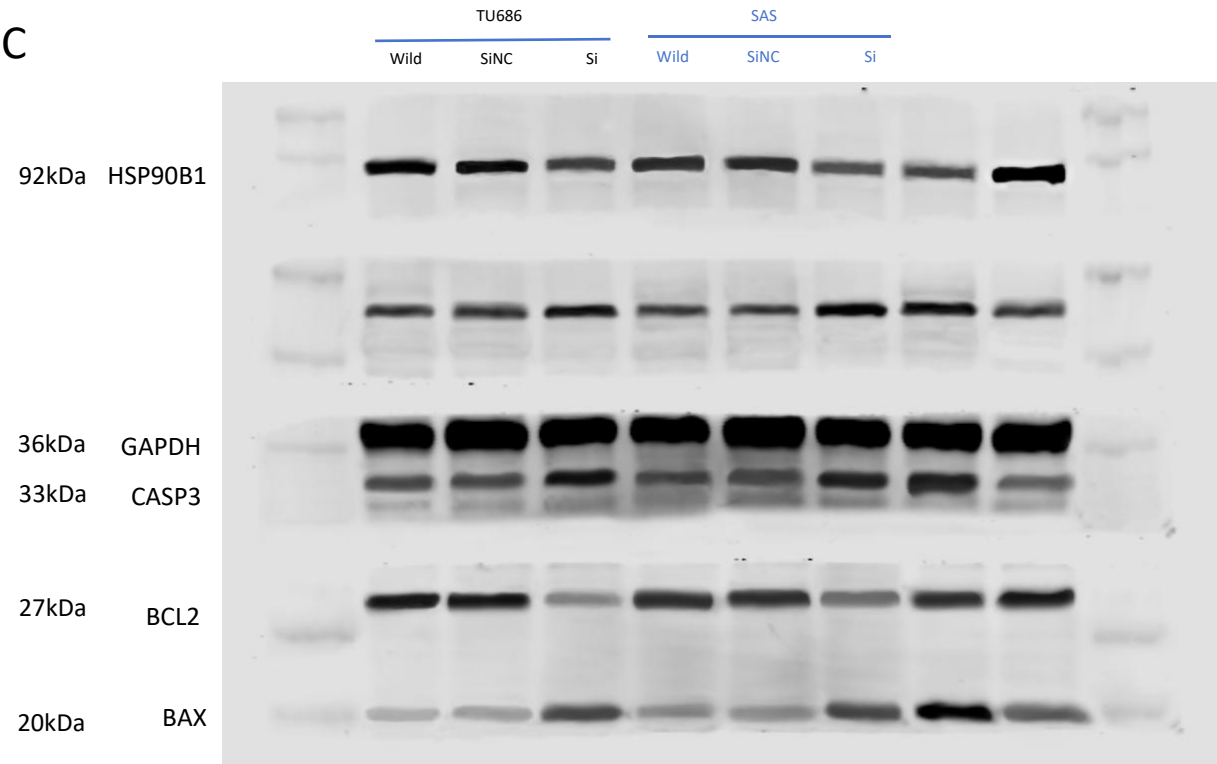

**Figure 2. WB for detecting apoptosis.**  
OE(OverexpressHSP90B1), EV(empty vector control). Experimental repetition 3 times

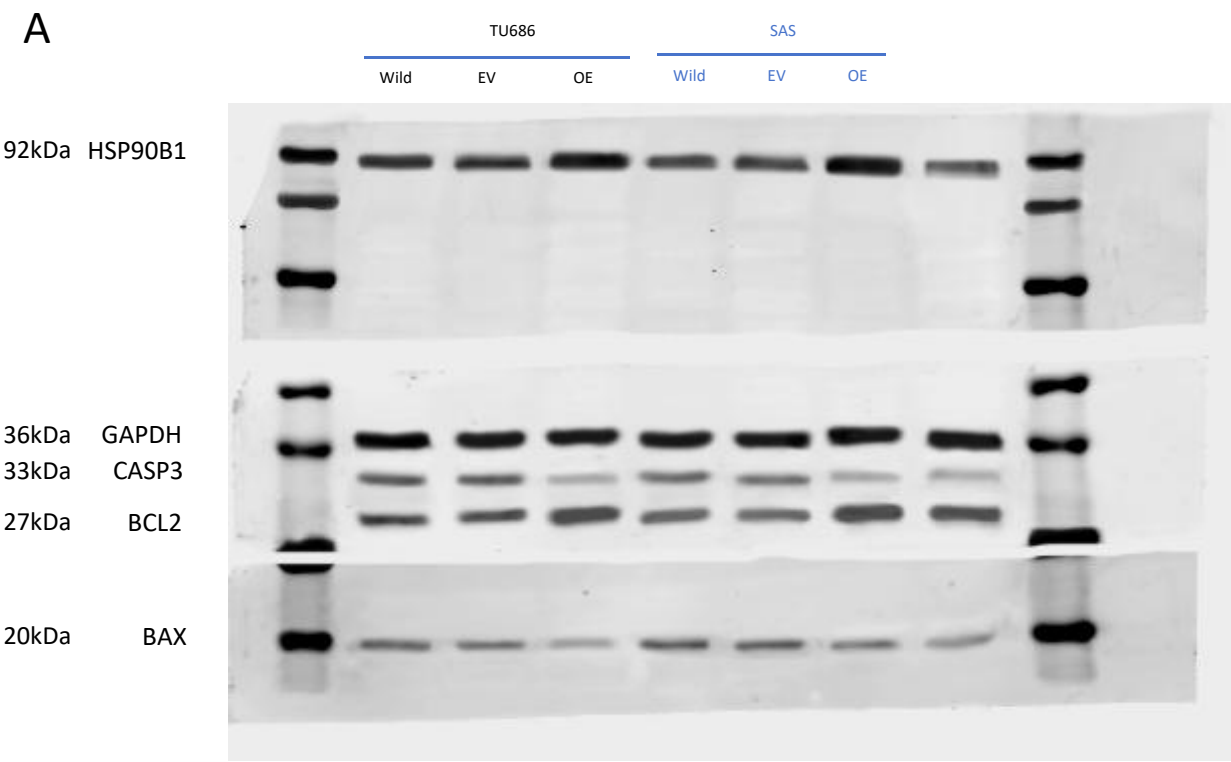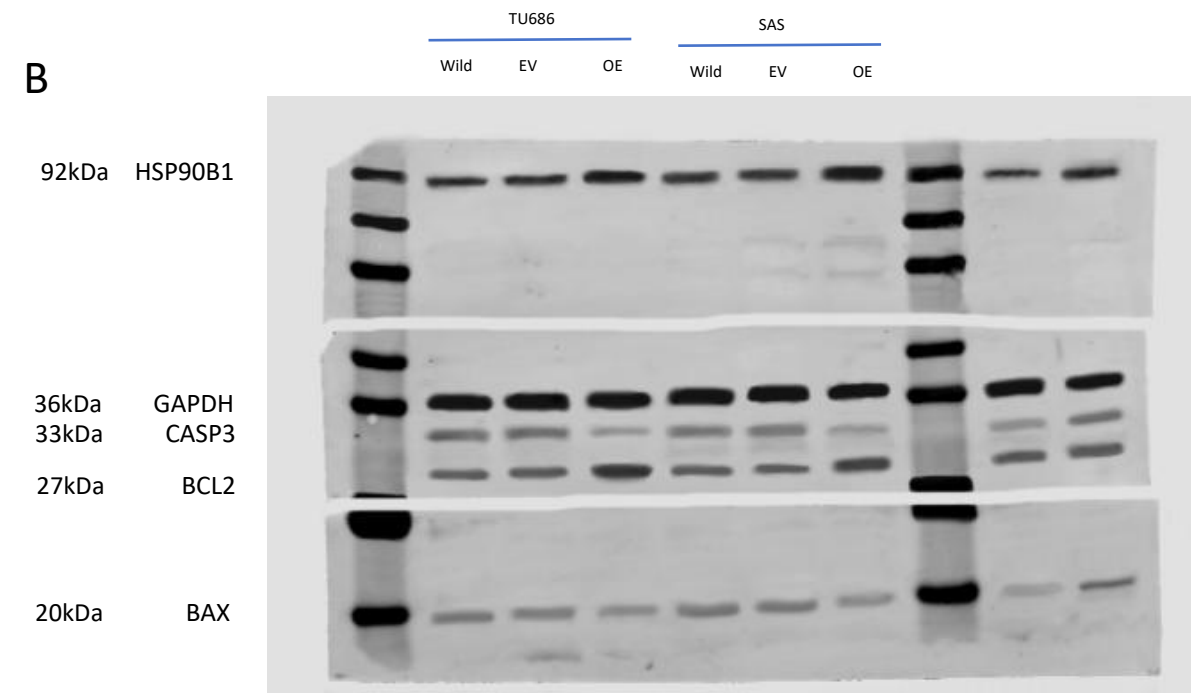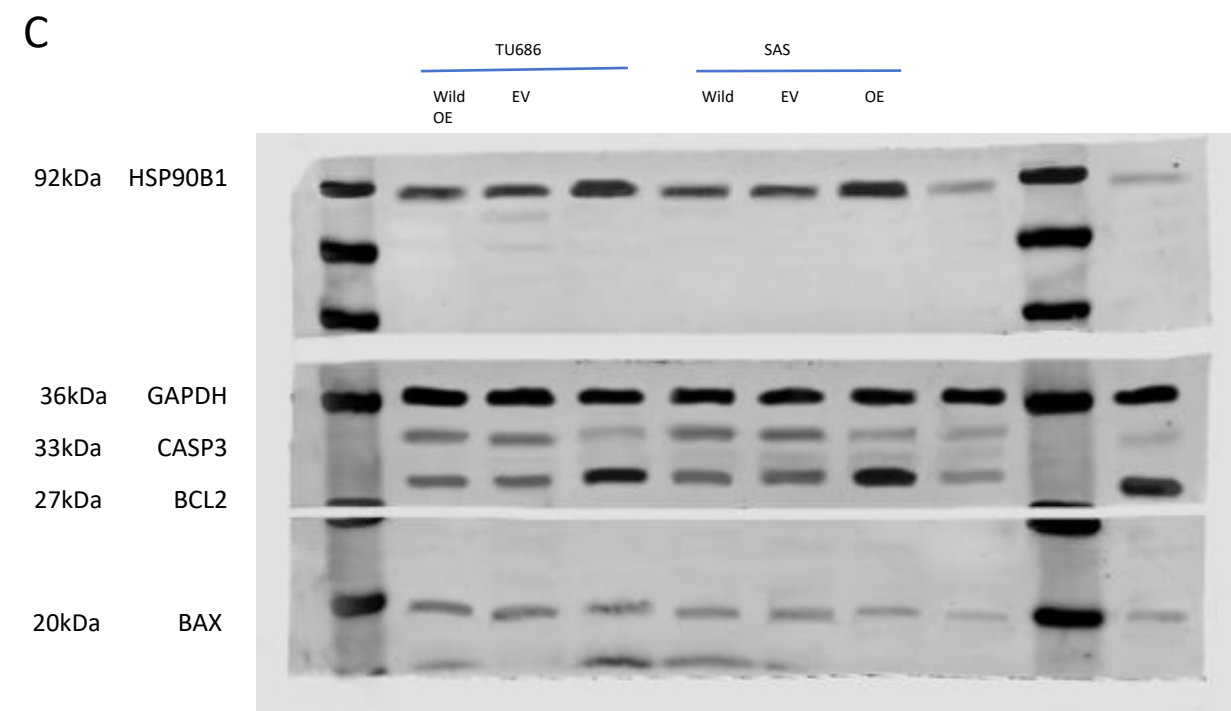

**Figure 4. WB for PI3K/AKT/mTOR signaling pathway.**  
SiHSP90B1.Experimental repetition 3 times.

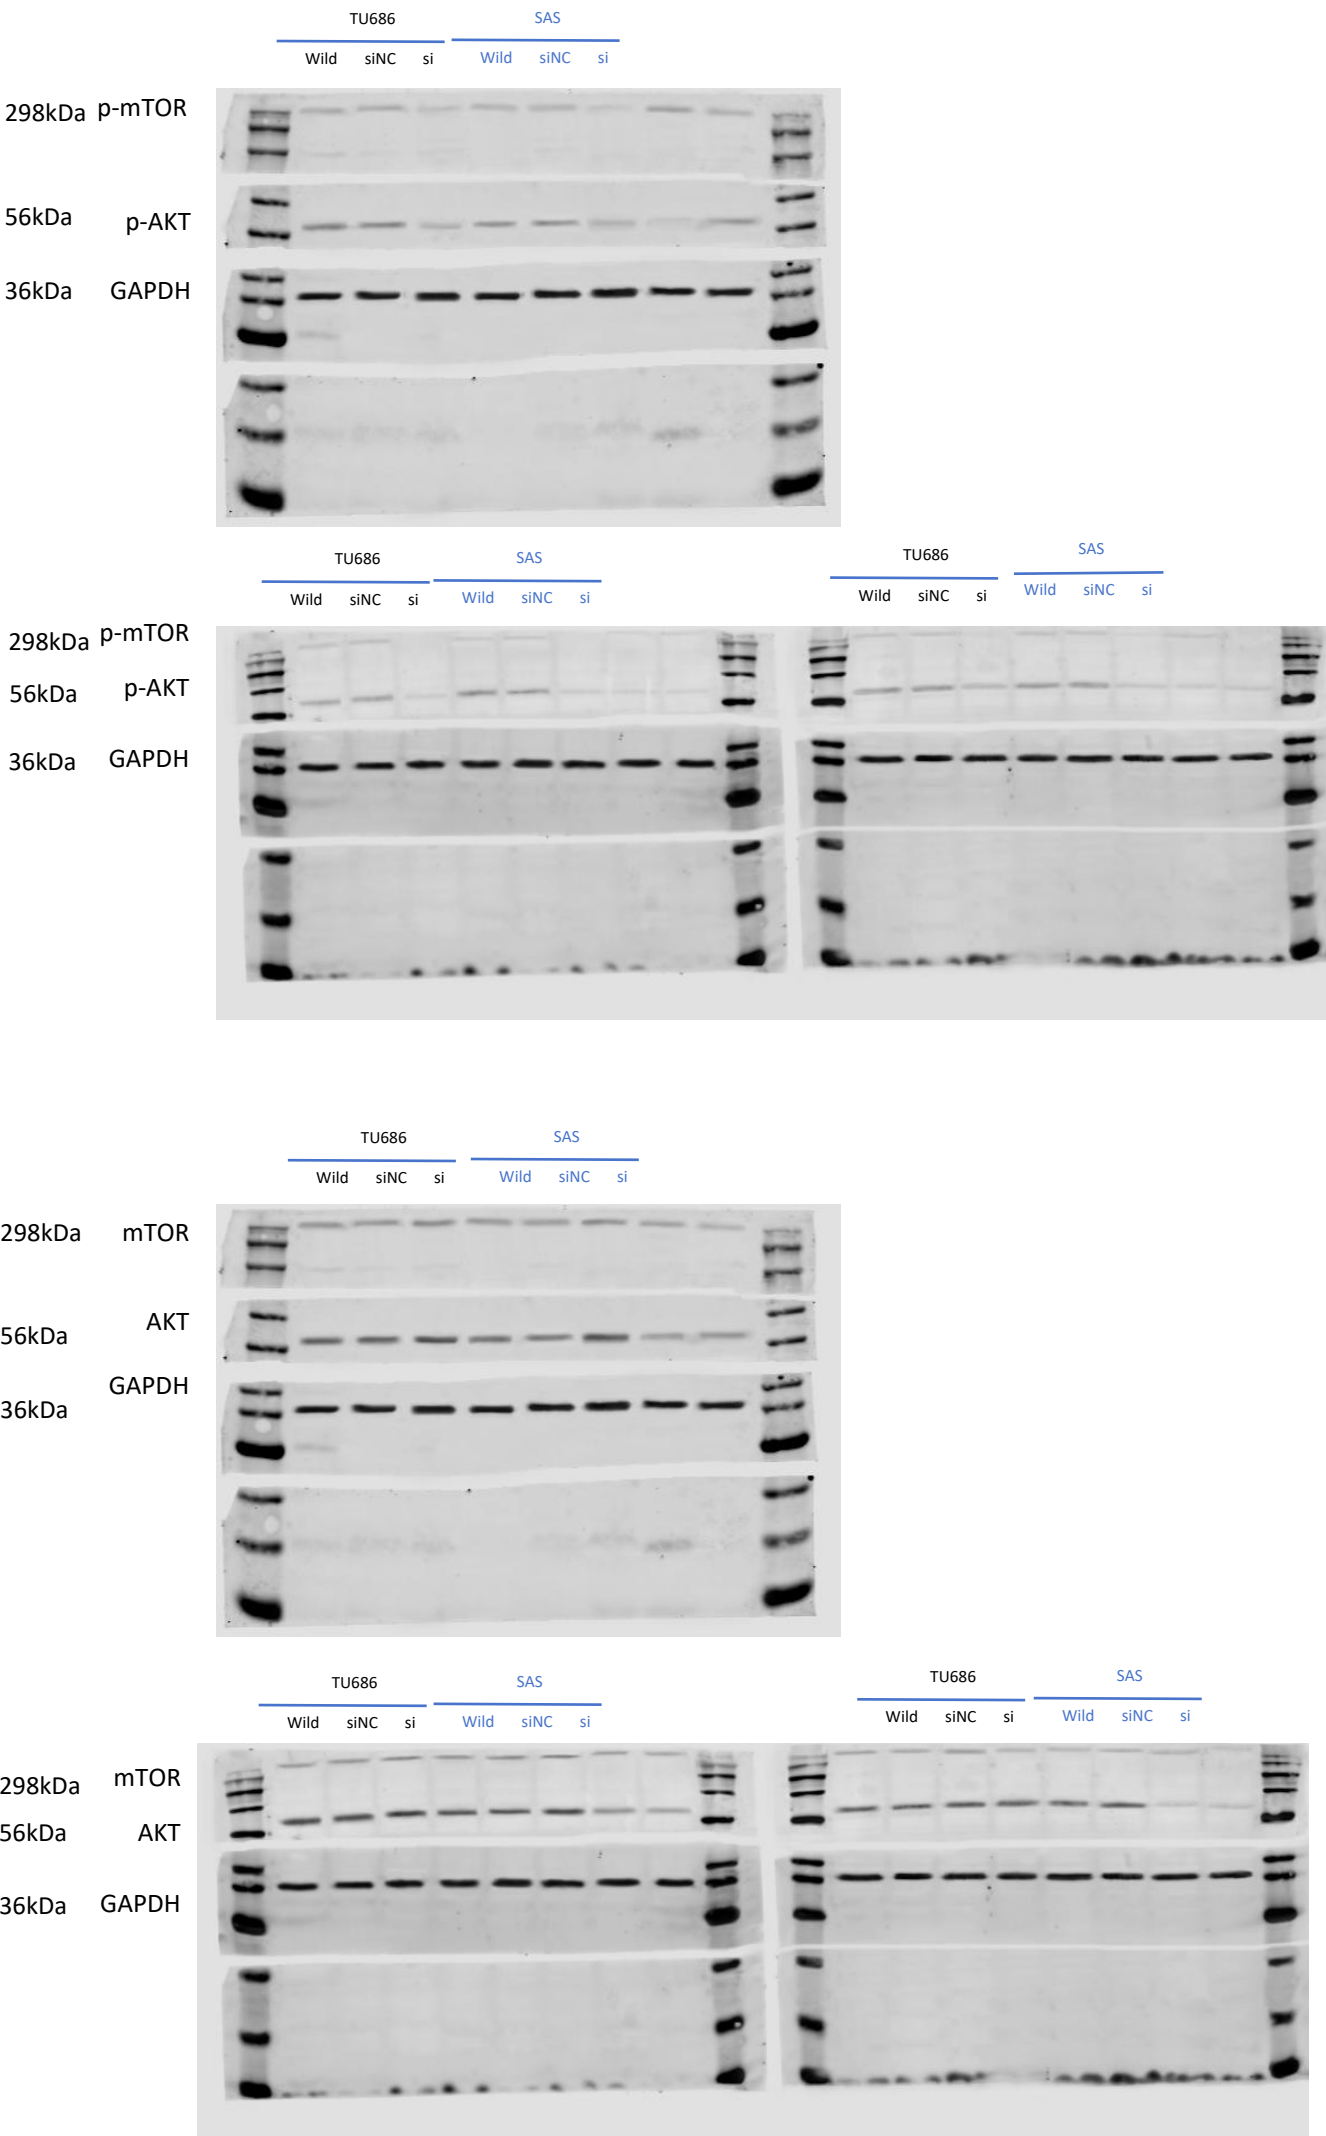

**Figure 4. WB for PI3K/AKT/mTOR signaling pathway.**  
OverexpressHSP90B1. Experimental repetition 3 times.

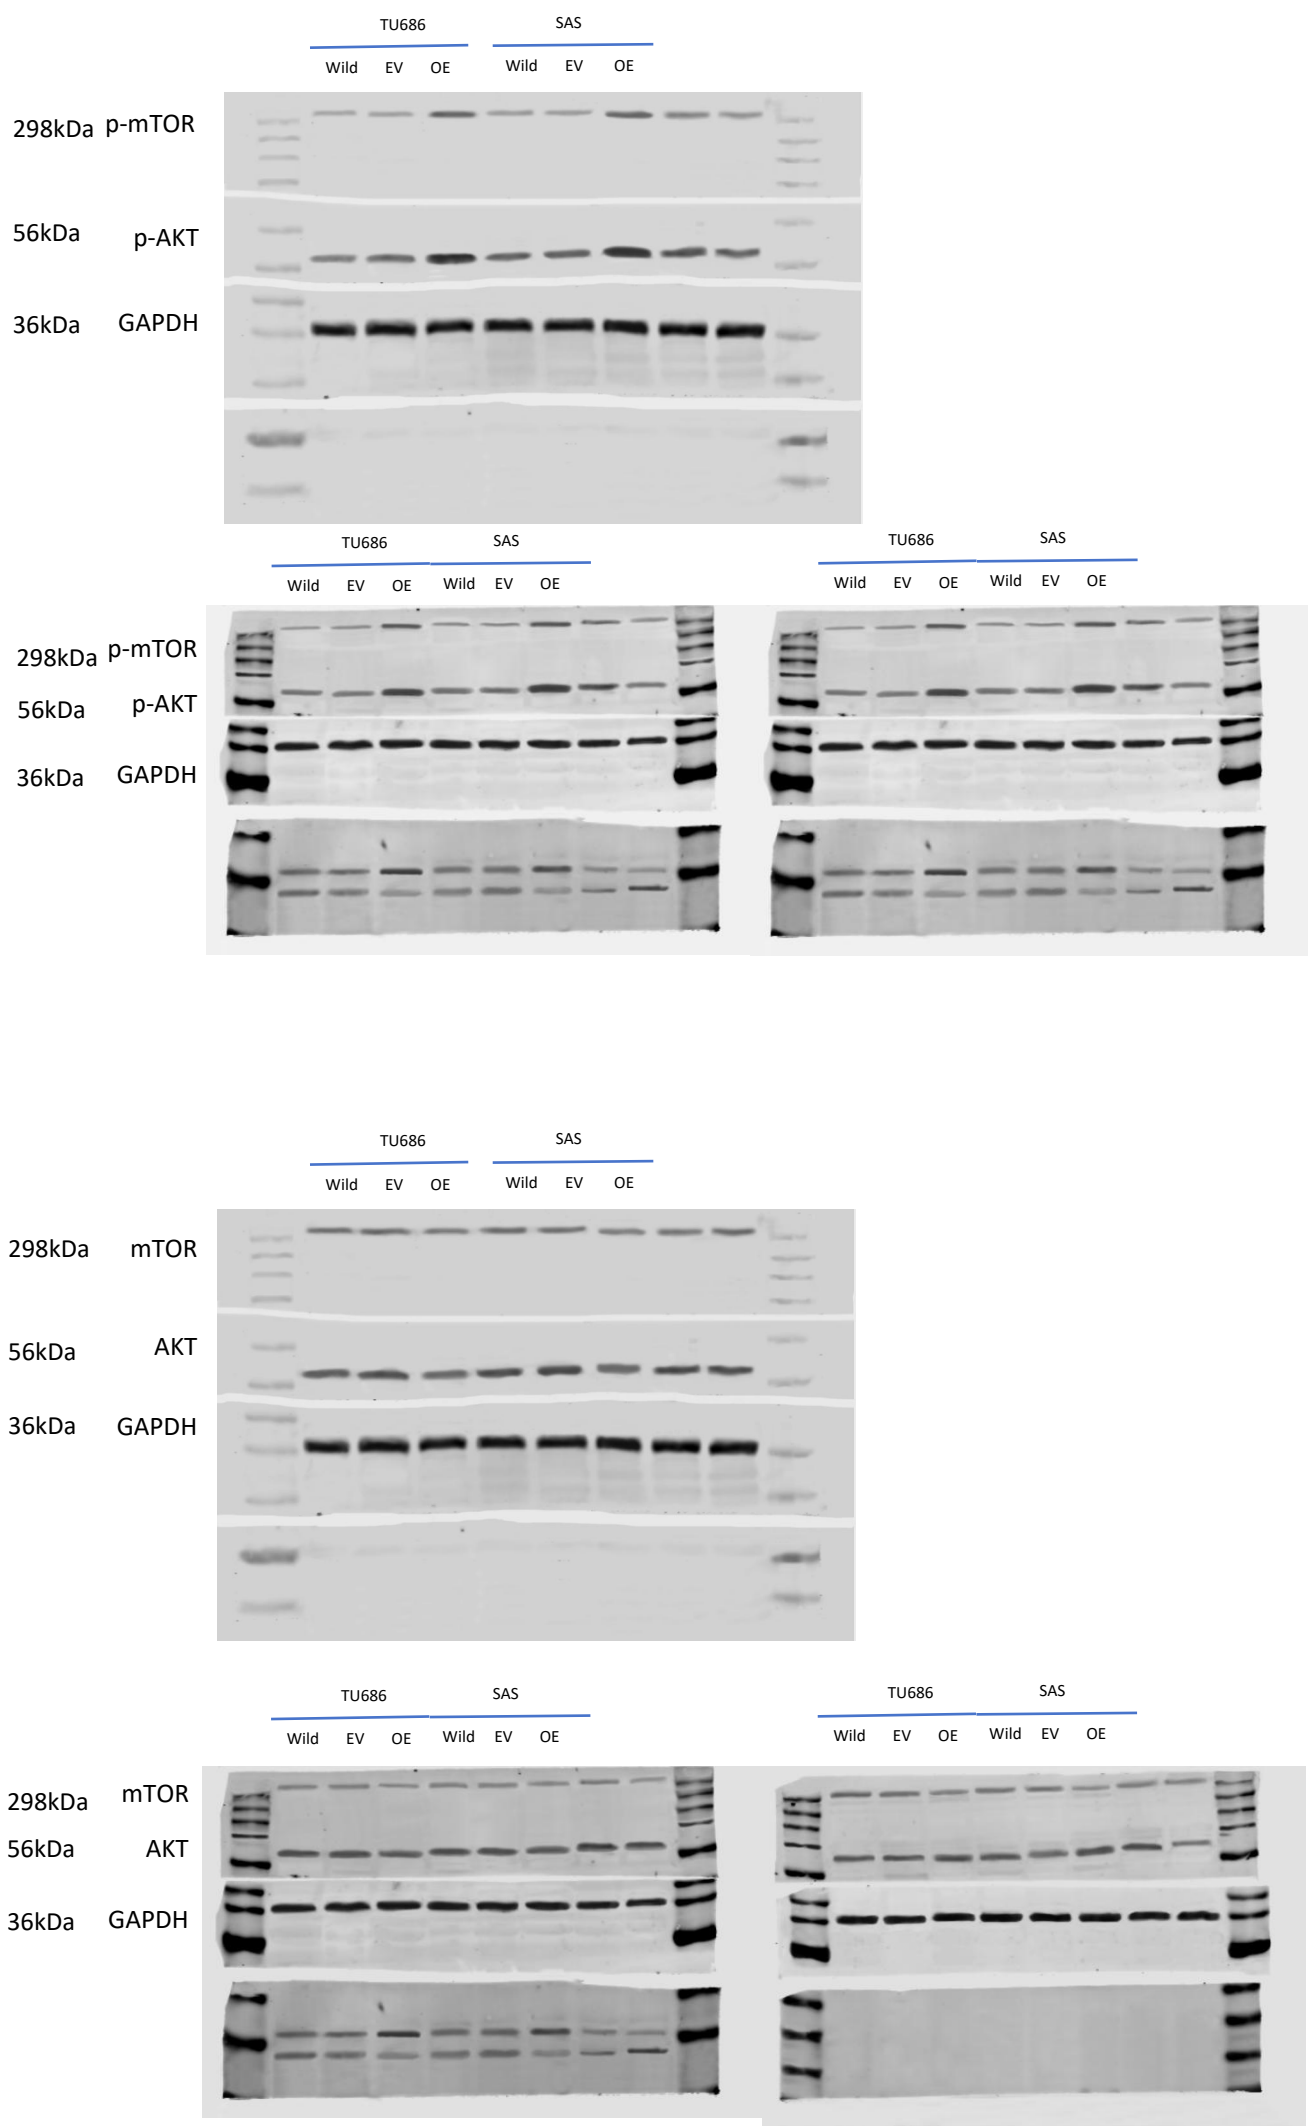

**Figure 4. WB for autophagy.**  
SiHSP90B1. Experimental repetition 3 times

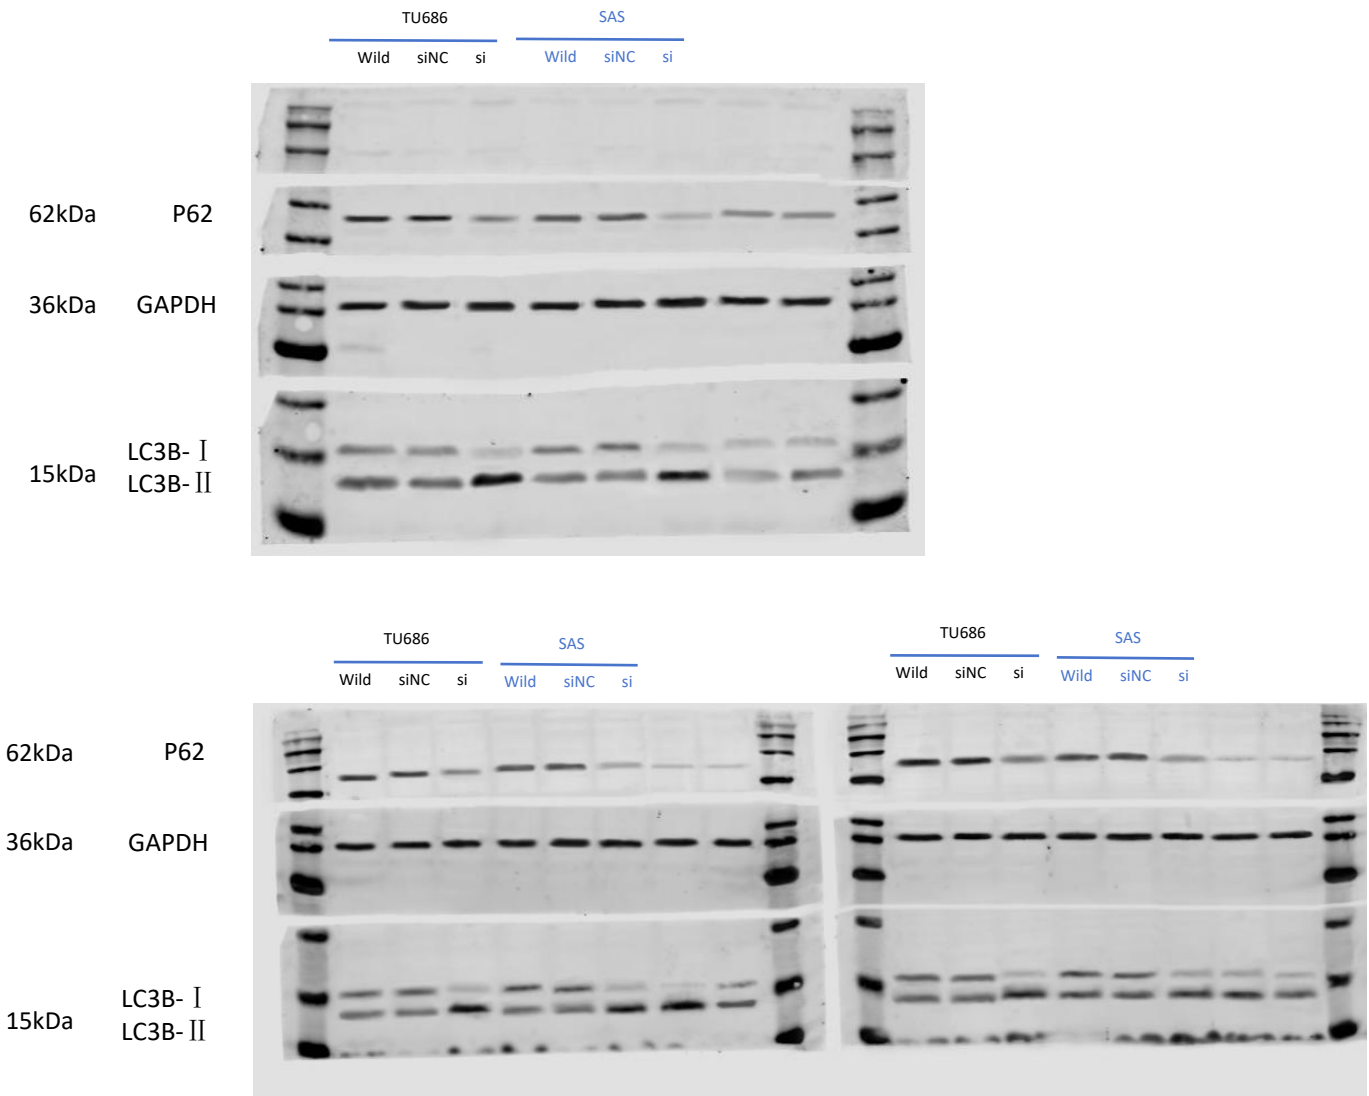

**Figure 4. WB for autophagy.**  
OverexpressHSP90B1. Experimental repetition 3 times

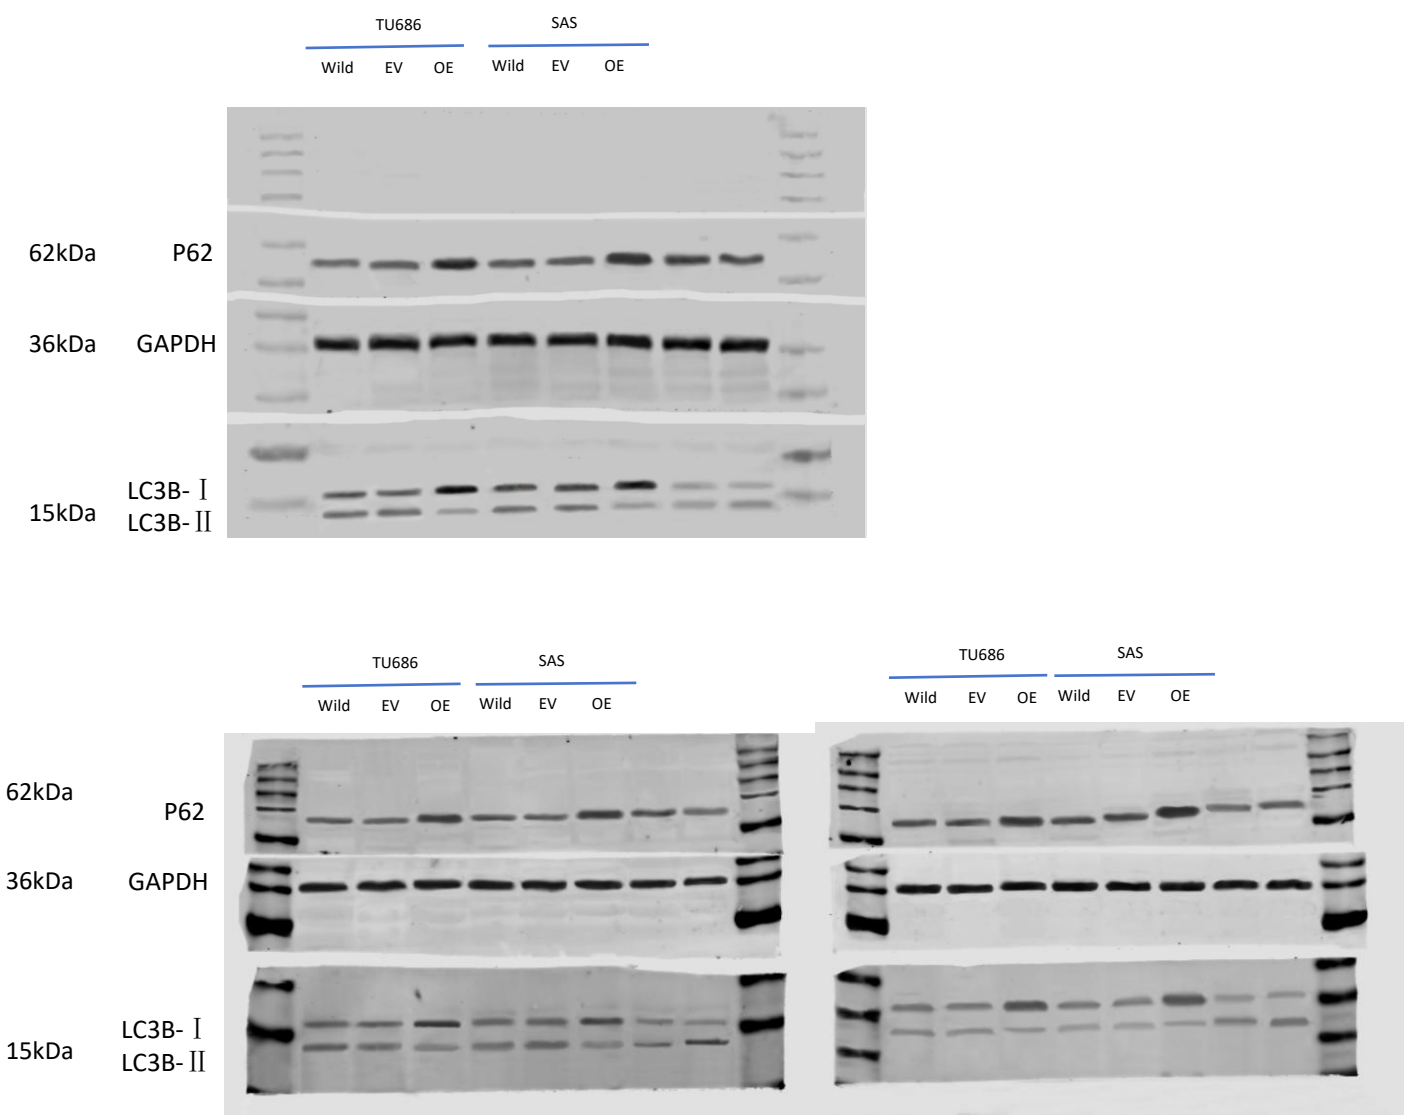

Supplement: WB.zip [file WB.zip]
