# Supplementary material for: HSP90B1 regulates autophagy via PI3K/AKT/mTOR signaling, mediating HNSC biological behaviors
Source: PeerJ. 2024 Apr 5;12:e17028. doi: 10.7717/peerj.17028 (PMC11000640; doi:10.7717/peerj.17028)
Supplement: Supplemental Information 2 [file peerj-12-17028-s002.xlsx]

## Sheet: mRNA expression in HNSC cells
mRNA expression in HNSC cells
Repeat 1					Repeat 2				Repeat 3
Target Name	CT	ΔΔCT	RQ(Relative expression quantity)		CT	ΔΔCT	RQ		CT	ΔΔCT	RQ
HOK	27.3048	-0.270204	1.20598		27.8435	-0.00514606	1.00357		28.8485	0.114582	0.92365
HOK	27.282	0.0179773	0.987616		27.6328	0.0244231	0.983214		28.682	-0.202475	1.15067
HOK	27.7614	0.252226	0.8396		27.7414	-0.0192771	1.01345		28.7714	0.0878929	0.940896
TU686	24.314	-3.46071	11.0097		24.404	-3.59746	12.1044		25.857	-3.17549	9.03478
TU686	24.3292	-3.19825	9.17846		24.5923	-3.36828	10.3265		25.525	-3.34676	10.1736
TU686	24.1025	-3.54546	11.6759		24.7625	-3.27961	9.71091		25.8225	-3.26368	9.60428
GAPDH（HOK）	17.1842				17.2237				17.5837
GAPDH（HOK）	16.8732				16.9834				17.7342
GAPDH（HOK）	17.1184				17.1357				17.5332
GAPDH（TU686）	17.3839				17.3765				17.8822
GAPDH（TU686）	17.1367				17.3357				17.7215
GAPDH（TU686）	17.2572				17.4172				17.9359
HOK	27.3048	-0.33687	1.26301		27.8435	-0.00514606	1.00357		28.8485	0.114582	0.92365
HOK	27.482	0.151311	0.900432		27.6328	0.0244231	0.983214		28.682	-0.202475	1.15067
HOK	27.7614	0.18556	0.879308		27.7414	-0.0192771	1.01345		28.7714	0.0878929	0.940896
Fadu	25.314	-2.56707	5.92603		25.3007	-3.08916	8.51001		25.287	-2.68161	6.4157
Fadu	25.3452	-2.70557	6.52314		25.5223	-2.66833	6.35692		25.1925	-2.70351	6.51383
Fadu	25.0105	-3.14936	8.87259		25.8225	-2.51835	5.72926		25.0225	-2.85368	7.22841
GAPDH（HOK）	17.1842				17.2237				17.5837
GAPDH（HOK）	16.8732				16.9834				17.7342
GAPDH（HOK）	17.1184				17.1357				17.5332
GAPDH（Fadu）	17.4236				17.7649				16.8183
GAPDH（Fadu）	17.5933				17.5657				16.7457
GAPDH（Fadu）	17.7024				17.7159				16.7259
HOK	27.3048	-0.270204	1.20598		27.8435	-0.00514606	1.00357		28.8485	0.114582	0.92365
HOK	27.282	0.0179773	0.987616		27.6328	0.0244231	0.983214		28.682	-0.202475	1.15067
HOK	27.7614	0.252226	0.8396		27.7414	-0.0192771	1.01345		28.7714	0.0878929	0.940896
SAS	23.104	-3.37071	10.3439		24.273	-3.11685	8.67494		25.3207	-3.31791	9.97217
SAS	23.3452	-3.12225	8.70746		24.0223	-3.13828	8.80476		25.4023	-3.06366	8.36089
SAS	23.5125	-3.00546	8.03034		24.1225	-3.31961	9.98392		25.3225	-3.20368	9.21305
GAPDH（HOK）	17.1842				17.2237				17.5837
GAPDH（HOK）	16.8732				16.9834				17.7342
GAPDH（HOK）	17.1184				17.1357				17.5332
GAPDH（SAS）	16.0839				16.7649				17.4883
GAPDH（SAS）	16.0767				16.5357				17.3157
GAPDH（SAS）	16.1272				16.8172				17.3759

## Sheet: Protein expression in HNSC cell
Protein expression in HNSC cells
Repeat	Samples	Values（HSP90B1）	Values（GAPDH）	Standardized	RQ(Relative expression quantity)
1	HOK	13209.3	55582.6	13209.3	1
	TU686	35908.7	50119.3	39822.9	3.01476
	Fadu	25212.5	58983.3	23758.9	1.79865
	SAS	30699.8	53373.8	31970.3	2.42028
2	HOK	16012	58947.8	15097.9	1
	TU686	48910.3	56100.6	48458.6	3.20962
	Fadu	31721	58614	30080.4	1.99235
	SAS	43600.7	57060.2	42471.6	2.81307
3	HOK	8500.6	35998.1	13125.3	1
	TU686	22400.5	36145.8	34446	2.6244
	Fadu	18098.2	38820.6	25912.7	1.97426
	SAS	22044.7	36346.6	33711.6	2.56845

## Sheet: IHC socres
IHC socres
HNSC tissues	Normal tissues
12	2
12	3
12	6
12	6
12	9
12	9
12	9
12	8
9	4
9	6
9	6
9	8
9	8
9	6
9	4
9	6
8	3
8	6
8	6
8	6
8	6
8	3
8	6
6	3
6	4
6	3
4	3
4	3
4	4
4	4
3	1
3	1
4	3
2	1
3	2
9	6
9	8
8	6
8	6
8	4
8	4
8	4
4	2
4	3
4	3

## Sheet: Cellular OD values of CCK8
CCK8
Cellular OD values
TU686	Repeat 1						Repeat 2						Repeat 3
trt	Day0	Day1	Day2	Day3	Day4		Day0	Day1	Day2	Day3	Day4		Day0	Day1	Day2	Day3	Day4
si	0.318347	0.478347	0.598364	0.784906	0.9684		0.323242	0.479873	0.588495	0.772235	0.975465		0.324645	0.496769	0.568933	0.804732	0.997458
si	0.335396	0.519622	0.56879	0.832897	0.9553		0.335632	0.507654	0.597486	0.846521	0.945672		0.34769	0.485787	0.603746	0.804235	0.934546
si	0.35779	0.484779	0.612084	0.783529	0.858863		0.357534	0.497654	0.572396	0.792658	0.884724		0.339869	0.51479	0.583483	0.826735	1.02584
siNC	0.368347	0.514456	0.60758	1.01422	1.23448		0.356533	0.512342	0.603876	1.06485	1.28676		0.342375	0.527857	0.689875	1.05746	1.30579
siNC	0.335396	0.539733	0.606215	0.940612	1.1823		0.359867	0.496562	0.687654	1.03785	1.20568		0.347868	0.53855	0.648923	1.18457	1.21678
siNC	0.356779	0.483591	0.684143	1.00914	1.29344		0.348563	0.505645	0.643246	0.957674	1.17898		0.359383	0.518648	0.636544	1.14697	1.24675
Wild	0.345968	0.505968	0.665802	1.03422	1.27321		0.336743	0.538765	0.618979	1.07453	1.32459		0.360897	0.537689	0.668473	1.07457	1.2349
Wild	0.332632	0.532632	0.672111	0.981332	1.28634		0.346763	0.518765	0.683766	0.963184	1.06885		0.342485	0.526536	0.687582	1.15679	1.26498
Wild	0.323533	0.503533	0.624142	1.00965	1.18444		0.336754	0.504329	0.669874	0.995439	1.23757		0.335659	0.520596	0.655739	0.978857	1.1879
EV	0.335688	0.472358	0.584546	0.965236	1.35677		0.358968	0.445387	0.584546	0.968482	1.34568		0.356875	0.496287	0.597545	0.990656	1.27958
EV	0.366754	0.452346	0.626675	1.04467	1.27856		0.374354	0.452786	0.628954	1.09847	1.26386		0.366775	0.468929	0.666867	1.07951	1.33856
EV	0.34757	0.447865	0.635676	0.974356	1.23546		0.343277	0.477865	0.646656	0.984356	1.1959		0.347549	0.447865	0.635098	0.960766	1.21756
OE	0.345237	0.513256	0.746559	1.31455	1.58555		0.353266	0.557876	0.757685	1.27455	1.47786		0.364544	0.523256	0.777875	1.3279	1.47555
OE	0.37643	0.484566	0.706746	1.19769	1.44786		0.363573	0.525667	0.647878	1.18769	1.54786		0.36558	0.494886	0.721697	1.27876	1.57005
OE	0.357836	0.467852	0.643526	1.29454	1.65436		0.336764	0.489226	0.733526	1.31457	1.64544		0.349084	0.477905	0.670386	1.25086	1.65886
SAS
trt	Day0	Day1	Day2	Day3	Day4		Day0	Day1	Day2	Day3	Day4		Day0	Day1	Day2	Day3	Day4
si	0.334658	0.458347	0.577742	0.865877	0.996612		0.335868	0.45769	0.527654	0.773985	0.997672		0.335637	0.465484	0.525787	0.797649	0.987439
si	0.336217	0.419622	0.53459	0.830971	1.0343		0.345479	0.407866	0.535876	0.810896	0.935785		0.35879	0.407857	0.575893	0.862375	0.952368
si	0.35879	0.40779	0.527843	0.793648	0.918863		0.356786	0.435866	0.57293	0.858427	1.03455		0.348679	0.438766	0.547458	0.805479	1.02335
siNC	0.36658	0.484456	0.635682	1.14211	1.30447		0.336856	0.425869	0.643788	1.17434	1.35649		0.348549	0.434866	0.596484	1.15438	1.25484
siNC	0.339622	0.469733	0.621291	1.01246	1.1723		0.347695	0.486439	0.57909	1.04568	1.20569		0.354487	0.454589	0.675449	1.08689	1.32548
siNC	0.357901	0.413591	0.585342	1.05139	1.32344		0.354684	0.431824	0.605835	1.03476	1.34588		0.345857	0.463827	0.636844	1.03467	1.24687
Wild	0.348098	0.475968	0.578458	1.13611	1.3798		0.357345	0.437856	0.579309	1.07564	1.38765		0.335858	0.497468	0.585457	1.07648	1.39679
Wild	0.333174	0.432632	0.632025	1.06246	1.30634		0.354689	0.495768	0.638755	1.06756	1.22739		0.334857	0.435893	0.64498	1.17435	1.26465
Wild	0.322913	0.423533	0.624143	1.03394	1.25247		0.335875	0.457659	0.598397	1.14322	1.28579		0.345769	0.455784	0.626459	1.11589	1.29676
EV	0.365345	0.435789	0.597683	0.995735	1.19687
EV	0.353658	0.452349	0.639899	1.03659	1.34675
EV	0.348348	0.487525	0.572445	1.08529	1.26348
OE	0.346746	0.477685	0.664858	1.37261	1.53688
OE	0.339674	0.496563	0.695784	1.30679	1.62779
OE	0.357873	0.526379	0.753468	1.26688	1.73724
SAS
trt
OE
OE
OE
Wild
Wild
Wild

## Sheet: WB of apoptosis and michanism 
Fig 2. WB of apoptosis
si-HSP90B1
			Repeat 1					Repeat 2					Repeat 3
Genes	Samples	Groups	Values（HSP90B1）	Values（GAPDH）	Standardized	RQ(Relative expression quantity)
HSP90B1	TU686	Wild	57332.7	86833.3	57332.7	1		37543.5	61832.3	37543.5	1		41322.3	54854.2	41322.3	1
		siNC	56793.9	90833.3	54292.9	0.946979		36792.7	57543.3	39535.1	1.05305		38814.5	55324.6	38484.5	0.931324
		si	23022.5	87183.3	22930.1	0.399948		16822.5	60523.7	17186.3	0.457769		17522.5	53053.8	18117.2	0.438436
	SAS	wild	48012	83947.8	48012	1		33345.4	56824.8	33345.4	1		32345.4	57452.4	32345.4	1
		siNC	46710.3	91600.6	42807.9	0.891607		33763.5	58542.5	32772.8	0.982829		31763.5	56149.4	32500.6	1.0048
		si	21721	88614	20577.2	0.428584		17724.5	59654.8	16883.7	0.506328		14824.5	55841.8	15252.1	0.471539
CASP3	TU686	Wild	27580.1	86833.3	27580.1	1		17324.3	61832.3	17324.3	1		19376.5	54854.2	19376.5	1
		siNC	29972.4	90833.3	28652.5	1.03888		18634.3	57543.3	20023.3	1.15579		16791.4	55324.6	16648.7	0.859218
		si	51168.4	87183.3	50962.9	1.84781		30423.7	60523.7	31081.5	1.79409		28305.8	53053.8	29266.4	1.51041
	SAS	wild	31994.3	83947.8	31994.3	1		18423.5	56824.8	18423.5	1		13476.3	57452.4	13476.3	1
		siNC	30846.4	91600.6	28269.4	0.883574		18024.5	58542.5	17495.6	0.949632		12863.8	56149.4	13162.4	0.976705
		si	51622.4	88614	48904.1	1.52852		24546.2	59654.8	23381.8	1.26913		21135.8	55841.8	21745.4	1.6136
BCL2	TU686	Wild	45782.2	86833.3	45782.2	1		33539.4	61832.3	33539.4	1		30563.5	54854.2	30563.5	1
		siNC	48491.8	90833.3	46356.4	1.01254		32143.8	57543.3	34539.7	1.02982		25247.6	55324.6	25033	0.819048
		si	28373.4	87183.3	28259.5	0.61726		18356.8	60523.7	18753.7	0.559154		14265.5	53053.8	14749.6	0.482588
	SAS	wild	44740.5	83947.8	44740.5	1		28734.4	56824.8	28734.4	1		26732.6	57452.4	26732.6	1
		siNC	44160.5	91600.6	40471.1	0.904576		31959.6	58542.5	31021.9	1.07961		24948.9	56149.4	25527.8	0.954934
		si	30635.3	88614	29022.2	0.648678		16324.6	59654.8	15550.2	0.541171		16324.6	55841.8	16795.5	0.628278
BAX	TU686	Wild	21237.9	86833.3	21237.9	1		21237.9	61832.3	21237.9	1		19547.3	54854.2	19547.3	1
		siNC	22211	90833.3	21232.9	0.999764		20911	57543.3	22469.6	1.058		17245.8	55324.6	17099.2	0.874757
		si	27153.8	87183.3	27044.7	1.27342		26153.8	60523.7	26719.3	1.25809		20976	53053.8	21687.8	1.1095
	SAS	wild	17067.6	83947.8	17067.6	1		19766.2	56824.8	19766.2	1		18341.4	57452.4	18341.4	1
		siNC	18539.5	91600.6	16990.6	0.995488		17769.9	58542.5	17248.5	0.872627		19253.1	56149.4	19699.9	1.07407
		si	23036.6	88614	21823.6	1.27865		22983.7	59654.8	21893.4	1.10762		21824.7	55841.8	22454.1	1.22423
Fig 2. WB of apoptosis
Overexpress-HSP90B1
HSP90B1	TU686	Wild	42332.4	78837.2	42332.4	1		37638.7	61838.3	37638.7	1		38662.3	57454.2	38662.3	1
		EV	43752.8	82333.2	41894.9	0.989665		36792.7	57753.3	39395.1	1.04667		37864.5	56641.6	38407.7	0.993414
		OE	81022.5	83753.3	76266.7	1.80161		56262.5	59523.7	58450.4	1.55293		70962.5	53911.8	75625.4	1.95605
	SAS	wild	38057.1	78947.8	38057.1	1		33615.4	56824.8	33615.4	1		37655.4	57452.4	37655.4	1
		EV	36790.2	80960.6	35875.5	0.942678		33763.5	58542.5	32772.8	0.974935		40763.5	56149.4	41709.4	1.10766
		OE	77720.9	78413.9	78250	2.05612		57724.5	59164.8	55441.6	1.64929		66824.5	55841.8	68751.9	1.82582
CASP3	TU686	Wild	32580.2	78837.2	32580.2	1		27531.7	61832.3	27531.7	1		19863.5	54854.2	19863.5	1
		EV	30972.4	82333.2	29657.3	0.910286		28046.4	57543.3	30136.8	1.09463		17491.4	55324.6	17342.7	0.873093
		OE	21638.4	83753.3	20368.2	0.625173		19474.7	60523.7	19895.7	0.722649		11305.8	53053.8	11689.5	0.588491
	SAS	wild	27994.4	78947.8	27994.4	1		25246.5	56824.8	25246.5	1		17446.3	57452.4	17446.3	1
		EV	29846.7	80960.6	29104.7	1.03966		28024.8	58542.5	27202.5	1.07748		15843.9	56149.4	16211.5	0.929226
		OE	18543.4	78413.9	18669.7	0.666908		17876.2	59654.8	17028.2	0.674479		9135.78	55841.8	9399.27	0.538755
BCL2	TU686	Wild	33762.3	78837.2	33762.3	1		37549.4	61832.3	37549.4	1		33683.5	54854.2	33683.5	1
		EV	37471.7	82333.2	35880.6	1.06274		31646.8	57543.3	34005.6	0.905622		35242.7	55324.6	34943.1	1.03739
		OE	60043.4	83753.3	56519	1.67403		65766.7	60523.7	67188.7	1.78934		50235.7	53053.8	51940.5	1.54202
	SAS	wild	48450.5	78947.8	48450.5	1		284336	56824.8	284336	1		29587.9	57452.4	29587.9	1
		EV	45174.5	80960.6	44051.4	0.909206		315620	58542.5	306359	1.07745		28948.1	56149.4	29619.9	1.00108
		OE	67335.3	78413.9	67793.8	1.39924		514533	59654.8	490124	1.72375		48124.6	55841.8	49512.6	1.67341
BAX	TU686	Wild	26435.1	78837.2	26435.1	1		19476.9	61832.3	19476.9	1		16545.3	54854.2	16545.3	1
		EV	23711	82333.2	22704.2	0.858864		18910.2	57543.3	20319.6	1.04327		15245.8	55324.6	15116.2	0.913623
		OE	18158.8	83753.3	17092.9	0.646598		15553.8	60523.7	15890.1	0.815843		10976	53053.8	11348.5	0.685902
	SAS	wild	27067.1	78947.8	27067.1	1		23766.3	56824.8	23766.3	1		18391.5	57452.4	18391.5	1
		EV	28689.5	80960.6	27976.3	1.03359		27720	58542.5	26906.6	1.13214		17253.1	56149.4	17653.5	0.959876
		OE	20036.7	78413.9	20173.1	0.745299		21183.7	59654.8	20178.8	0.849052		14024.7	55841.8	14429.1	0.784557
Fig 4. WB of PI3K/AKT/mTOR signaling pathway
si-HSP90B1
			Repeat 1					Repeat 2					Repeat 3
Genes	Samples	Groups	Values（HSP90B1）	Values（GAPDH）	Standardized	RQ(Relative expression quantity)
p-mTOR	TU686	Wild	9853.34	45421.5	9853.34	1		9663.25	43437.4	9663.25	1		11753.6	40453.5	11753.6	1
		siNC	9734.35	43872.9	10077.9	1.02279		9456.34	42545.9	9654.5	0.999095		10036.6	39855.8	10187.2	0.866723
		si	5242.44	46284.7	5144.67	0.522125		5949.76	44087.3	5862.06	0.606634		7049.88	42544.8	6703.35	0.570321
	SAS	wild	8745.35	44079.9	8745.35	1		9253.57	42058.5	9253.57	1		9253.57	42358.5	9253.57	1
		siNC	8463.88	46864.6	7960.95	0.910307		9494.75	45068.3	8860.65	0.957538		9534.75	44668.3	9041.69	0.977103
		si	5031.76	47643.7	4655.37	0.532325		5434.55	43844.9	5213.12	0.563363		5034.55	43844.9	4863.87	0.525621
mTOR	TU686	Wild	12343.4	45421.5	12343.4	1		13634.7	43437.4	13634.7	1		14643.7	40453.5	14643.7	1
		siNC	11846.6	43872.9	12264.7	0.993628		13586.6	42545.9	13871.3	1.01735		13586.5	39855.8	13790.2	0.941718
		si	14336.4	46284.7	14069.1	1.13981		16463.6	44087.3	16220.9	1.18968		16667.5	42544.8	15848.3	1.08226
	SAS	wild	11034.8	44079.9	11034.8	1		12553.6	42058.5	12553.6	1		10678.8	42358.5	10678.8	1
		siNC	10846.8	46864.6	10202.2	0.924555		13035	45068.3	12164.4	0.968999		10947.8	44668.3	10381.7	0.972175
		si	14695.4	47643.7	13596.2	1.23212		15643.9	43844.9	15006.5	1.19539		11959.2	43844.9	11553.8	1.08194
p-AKT	TU686	Wild	12834.3	45421.5	12834.3	1		15654.6	43437.4	15654.6	1		14085.9	40453.5	14085.9	1
		siNC	13234.6	43872.9	13701.8	1.06759		15034.8	42545.9	15349.8	0.980533		13036.6	39855.8	13232.1	0.939392
		si	7973.42	46284.7	7824.73	0.609671		9564.76	44087.3	9423.77	0.601982		8049.88	42544.8	7654.2	0.543396
	SAS	wild	13983.7	44079.9	13983.7	1		14253.6	42058.5	14253.6	1		12253.8	42358.5	12253.8	1
		siNC	13789.4	46864.6	12970.1	0.927516		14634.8	45068.3	13657.4	0.958172		13045.2	44668.3	12370.6	1.00954
		si	7453.54	47643.7	6896	0.493147		8334.55	43844.9	7994.96	0.560909		7734.55	43844.9	7472.33	0.609799
AKT	TU686	Wild	27834.6	45421.5	27834.6	1		24456.6	43437.4	24456.6	1		28789.5	40453.5	28789.5	1
		siNC	29677.8	44872.9	30040.6	1.07926		22955.2	42545.9	23436.3	0.958281		27545.3	39855.8	27958.4	0.971131
		si	33657.8	46284.7	33030.1	1.18666		30311.5	44087.3	29864.6	1.22113		35353.5	42544.8	33615.7	1.16764
	SAS	wild	25983.7	44079.9	25983.7	1		22674.5	42058.5	22674.5	1		26842.9	42358.5	26842.9	1
		siNC	25789.4	46864.6	24257	0.933549		23683.7	45068.3	22101.9	0.974751		27873.2	44668.3	26431.9	0.984687
		si	31453.5	47643.7	29100.7	1.11996		29647.8	43844.9	28439.8	1.25427		29534.5	43844.9	28533.3	1.06297
Fig 4. WB of autophagy
si-HSP90B1
			Repeat 1					Repeat 2					Repeat 3
Genes	Samples	Groups	Values（HSP90B1）	Values（GAPDH）	Standardized	RQ(Relative expression quantity)
P62	TU686	Wild	27679.9	43563.5	27679.9	1		38418.2	45345.4	38418.2	1		24567.4	40453.5	24567.4	1
		siNC	26832.8	42877.9	27261.8	0.984895		34558.5	44568.9	35160.5	0.915206		23674.8	39855.8	24029.8	0.978119
		si	16357.3	44678.2	15949.2	0.576202		25316.5	43747.5	26241.2	0.68304		16239.5	42544.8	15441.3	0.628529
	SAS	wild	24453.7	43675.5	24453.7	1		32974.5	44656.7	32974.5	1		23584.9	42358.5	23584.9	1
		siNC	22378.5	45677	21397.9	0.875037		33683.6	47563.9	31624.8	0.959068		24956.7	44668.3	23666.1	1.00344
		si	13674.7	46973.7	12714.5	0.519944		22048.4	45670.6	21559	0.653807		14246.8	43844.9	13763.8	0.583585
LC3B-I	TU686	Wild	18456.7	43563.5	18456.7	1		20234.7	45345.4	20234.7	1		18074.7	40453.5	18074.7	1
		siNC	17832.8	42877.9	18117.9	0.981645		21053.7	44568.9	21420.5	1.0586		17073.7	39855.8	17329.7	0.958784
		si	10457.8	44678.2	10196.8	0.552474		12316.5	43747.5	12766.3	0.630914		9975.78	42544.8	9485.43	0.524791
	SAS	wild	17453.9	43675.5	17453.9	1		21977.9	44656.7	21977.9	1		20675.5	42358.5	20675.5	1
		siNC	17434.6	45677	16670.6	0.955124		21683.8	47563.9	20358.5	0.926317		21264.7	44668.3	20165	0.975307
		si	10674.7	46973.7	9925.14	0.568649		11048.4	45670.6	10803.2	0.491547		12778.6	43844.9	12345.3	0.597099
LC3B-II	TU686	Wild	23345.5	43563.5	23345.5	1		24465.2	45345.4	24465.2	1		23534.5	40453.5	23534.5	1
		siNC	21564.6	42877.9	21909.3	0.938484		23342.7	44568.9	23749.4	0.970739		22054.7	39855.8	22385.4	0.951174
		si	34467.7	44678.2	33607.7	1.43958		32215.8	43747.5	33392.5	1.3649		36785.9	42544.8	34977.7	1.48623
	SAS	wild	22564.9	43675.5	22564.9	1		24456.5	44656.7	24456.5	1		26215.5	42358.5	26215.5	1
		siNC	21856.5	45677	20898.7	0.926162		25645.7	47563.9	24078.2	0.984529		23754.7	44668.3	22526.3	0.859274
		si	35781.6	46973.7	33269.2	1.47438		33215.4	45670.6	32478.1	1.32799		34644.6	43844.9	33470	1.27673
II/I	TU686	Wild				1					1					1
		siNC				0.956032					0.917					0.992062
		si				2.6057					2.16336					2.83204
	SAS	wild				1					1					1
		siNC				0.969677					1.06284					0.881029
		si				2.59277					2.70165					2.13822
Overexpress-HSP90B1
Fig 4. WB of PI3K/AKT/mTOR pathway
p-mTOR	TU686	Wild	8144.2	52213.3	8144.2	1		17638.7	46057.7	17638.7	1		19457.3	55456.4	19457.3	1
		EV	10129	58610	9023.55	1.10797		16702.7	47557.3	16176	0.917075		17864.5	53994.2	18348.3	0.943
		OE	17596.2	53677	17116.4	2.10167		28262.1	45779.2	28434	1.61203		32962.5	54505.2	33537.8	1.72366
	SAS	wild	10218.6	52856.3	10218.6	1		13665.4	44707.3	13665.4	1		17655.4	57452.4	17655.4	1
		EV	11038.5	54223.6	10760.2	1.05301		13783.5	44696.4	13786.8	1.00889		15763.5	54131.5	16730.5	0.947618
		OE	20360.3	54332.5	19807.1	1.93835		23754.5	45450.2	23366.2	1.70989		30824.5	54881.8	32268.3	1.82768
mTOR	TU686	Wild	13382.8	52213.3	13382.8	1		25638.1	46057.7	25638.1	1		28534.3	55456.4	28534.3	1
		EV	17786.2	58610	15845	1.18399		27022.7	47557.3	26170.6	1.02077		26436.6	53994.2	27152.5	0.951573
		OE	12965.2	53677	12611.7	0.942384		20632.8	45779.2	20758.2	0.809663		22911.6	54505.2	23311.4	0.81696
	SAS	wild	15316.9	52856.3	15316.9	1		23665.3	44707.3	23665.3	1		27895	57452.4	27895	1
		EV	13846.8	54223.6	13497.6	0.881225		24783.5	44696.4	24789.5	1.04751		25700.5	54131.5	27277.2	0.977852
		OE	11983.5	54332.5	11657.9	0.761112		20664.5	45450.2	20326.8	0.858928		23824.5	54881.8	24940.4	0.894083
p-AKT	TU686	Wild	20667.7	52213.3	20667.7	1		26531.3	46057.7	26531.3	1		23457.8	55456.4	23457.8	1
		EV	25265	58610	22507.6	1.08902		25573.8	47557.3	24767.4	0.933513		22454.4	53994.2	23062.5	0.98315
		OE	38051.4	53677	37013.7	1.7909		39962.1	45779.2	40205.2	1.51538		35962.5	54505.2	36590.1	1.55983
	SAS	wild	23729	52856.3	23729	1		25837.6	44707.3	25837.6	1		27655.4	57452.4	27655.4	1
		EV	24660.2	54223.6	24038.4	1.01304		23854.7	44696.4	23860.5	0.923481		25753.4	54131.5	27333.4	0.988358
		OE	40721.5	54332.5	39615.1	1.66948		37974.5	45450.2	37353.8	1.44572		40874.5	54881.8	42789	1.54722
AKT	TU686	Wild	18529.6	52213.3	18529.6	1		30568.3	46057.7	30568.3	1		35451.7	55456.4	35451.7	1
		EV	21490.6	58610	19145.1	1.03322		32856.5	47557.3	31820.5	1.04096		32054.4	53994.2	32922.5	0.928657
		OE	14174.3	53677	13787.8	0.744096		26962.5	45779.2	27126.5	0.887406		29894.8	54505.2	30416.5	0.85797
	SAS	wild	21059.4	52856.3	21059.4	1		28546.8	44707.3	28546.8	1		33656.4	57452.4	33656.4	1
		EV	24884.7	54223.6	24257.2	1.15185		26854.6	44696.4	26861.2	0.940953		31718.6	54131.5	33664.5	1.00024
		OE	18034.6	54332.5	17544.6	0.833097		22974.5	45450.2	22599	0.791648		29874.8	54881.8	31274.1	0.929218
Overexpress-HSP90B1
Fig 4. WB of autophagy
P62	TU686	Wild	26457.3	43115.4	26457.3	1		26418.1	46109.5	26418.1	1		27561.4	42345.5	27561.4	1
		EV	26574.5	47205.3	24272.1	0.917405		27458.5	47881.9	26442	1.00091		25676.8	40856.8	26612.3	0.965566
		OE	39562.6	43727.4	39008.8	1.47441		43316.5	48070.3	41549.5	1.57276		38564.9	42784.7	38169	1.38487
	SAS	wild	29477.9	42344.7	29477.9	1		22974.4	45754.7	22974.4	1		23584.9	42389.5	23584.9	1
		EV	27368.5	43132.5	26868.5	0.911482		23668.5	45748.6	23671.7	1.03035		24956.7	40768.3	25949	1.10024
		OE	42674.7	44214.7	40869.8	1.38646		36048.4	45670.2	36115.2	1.57197		41246.8	45678.7	38276.7	1.62293
LC3B-I	TU686	Wild	10983.6	43115.4	10983.6	1		22441.5	46109.5	22441.5	1		17507.4	42345.5	17507.4	1
		EV	13416.3	47205.3	12253.9	1.11566		23224.5	47881.9	22364.8	0.99658		16674.4	40856.8	17282	0.987127
		OE	19832.8	43727.4	19555.2	1.78041		35316.5	48070.3	33875.8	1.50952		30239.5	42784.7	29929.1	1.70952
	SAS	wild	15735.8	42344.7	15735.8	1		21974.8	45754.7	21974.8	1		15584.2	42389.5	15584.2	1
		EV	16409.8	43132.5	16110	1.02378		23668.6	45748.6	23671.8	1.07722		14056.7	40768.3	14615.6	0.937848
		OE	21482.8	44214.7	20574.2	1.30747		36058.5	45670.2	36125.2	1.64394		25246.8	45678.7	23428.8	1.50337
LC3B-II	TU686	Wild	24672.5	43115.4	24672.5	1		26335.7	46109.5	26335.7	1		10507.3	42345.5	10507.3	1
		EV	25919.5	47205.3	23673.8	0.959523		25324.5	47881.9	24387.1	0.926006		11603.7	40856.8	12026.5	1.14458
		OE	10981.4	43727.4	10827.7	0.438859		16316.5	48070.3	15650.9	0.594283		8029.53	42784.7	7947.1	0.75634
	SAS	wild	20228.7	42344.7	20228.7	1		24574.8	45754.7	24574.8	1		10584.7	42389.5	10584.7	1
		EV	18794.7	43132.5	18451.4	0.91214		25448.6	45748.6	25452	1.03569		11056.7	40768.3	11496.3	1.08613
		OE	10880.7	44214.7	10420.5	0.515136		15058.5	45670.2	15086.3	0.613894		7246.75	45678.7	6724.93	0.635345
II/I	TU686	Wild				1					1					1
		EV				0.86005					0.929185					1.15951
		OE				0.246494					0.393691					0.442429
	SAS	wild				1					1					1
		EV				0.890954					0.961449					1.15811
		OE				0.393993					0.37343					0.422615

## Sheet: Clone
	Colony size						Colony number
	TU686 cell
Repeat
1	si-HSP90B1	si-NC	Wild	EV	OE		si-HSP90B1	si-NC	Wild	EV	OE
2	115.67	157.58	144.73	156.32	235.22		79	123	117	115	159
3	107.43	179.54	158.28	167.45	203.56		102	114	126	123	189
	125.55	134.56	169.34	173.23	246.78		88	105	131	109	169
1			SAS cell
2	93.34	149.45	133.27	175.34	246.67		92	134	131	141	189
3	125.93	167.45	154.17	165.32	268.78		102	144	149	150	201
	101.73	131.23	165.33	150.34	211.46		129	159	165	147	232

## Sheet: Cell apoptosis of flow cytometr
Cell apoptosis of flow cytometric
	TU686 cell(%)						SAS cell (%)
Repeat	si	siNC	wild	EV	OE		si	siNC	wild	EV	OE
1	14.55	8.11	8.59	7.25	4.73		16.7	13.02	12.55	11.32	5.99
2	15.26	8.37	7.8	8.26	5.21		17.12	11.68	11.65	12.27	6.43
3	16.44	9.02	8.63	8.37	5.38		18.74	12.23	12.14	12.64	6.65

## Sheet: Migrated cells number
Migrated cells number
	TU686 cell						SAS cell
Repeat	si	siNC	Wild	EV	OE		si	siNC	Wild	EV	OE
1	54	132	145	139	221		41	145	145	160	256
2	67	148	166	159	245		58	177	156	149	210
3	82	167	178	175	267		69	129	164	188	244

## Sheet: Wound healing
Wound healing
TU686 cell
		Area	Area	Area
Repeat	Time	si-NC	si-HSP90B1	Wild	EV	OE
1	0h	1172499	1173729	1173508	1175498	1180332
	18h	709008	550251	519786	534783	205867
	Migrated rate (%)	39.5302	53.1194	55.7067	54.5058	82.5586
2	0h	1168748	1173429	1178988	1174343	1174998
	18h	689368	520251	519772	548724	287566
	Migrated rate (%)	41.0165	55.664	55.9137	53.274	75.5263
3	0h	1174868	1163429	1170508	1176395	1175238
	18h	599008	420266	469432	471863	248695
	Migrated rate (%)	49.0149	63.877	59.895	59.8891	78.8388
SAS cell
		Area	Area	Area
Repeat	Time	si-NC	si-HSP90B1	Wild	EV	OE
1	0h	1173429	1171285	1177334	1175634	1173243
	18h	653105	508581	466098	508784	326751
	Migrated rate (%)	44.3422	56.5792	60.4107	56.7226	72.1498
2	0h	1173429	1176285	1177334	1173245	1177882
	18h	680499	489008	519432	469232	305469
	Migrated rate (%)	42.0077	58.4278	55.8807	60.0056	74.0662
3	0h	1183768	1175241	1171592	1170345	1171543
	18h	576343	452341	425643	458242	210743
	Migrated rate (%)	51.3128	61.5108	63.6697	60.8456	82.0115

## Sheet: In vivo
Tumour weights			IHC scores of tummor
sh-NC	sh-HSP90B1		sh-NC	sh-HSP90B1
1.66	0.73		12	8
0.72	0.78		10	6
1.43	0.49		8	6
1.23	0.64		8	4
0.62	0.55		6	4
0.81	0.5		10	4
Tumor volume
trt	day 8	day 12	day 16	day 20	day 24	day 28
sh-NC	48	102	245	487	737	1224
sh-NC	27	67	162	267	375	604
sh-NC	42	82	204	412	624	1062
sh-NC	36	78	195	367	492	857
sh-NC	28	60	150	234	344	547
sh-NC	30	68	212	328	429	708
sh-HSP90B1	33	75	175	266	402	628
sh-HSP90B2	36	80	180	288	410	648
sh-HSP90B3	24	49	98	168	287	355
sh-HSP90B4	30	68	165	227	337	562
sh-HSP90B5	25	60	163	201	310	510
sh-HSP90B6	24	60	152	198	302	488
Fluorescence intensity
sh-NC	sh-HSP90B1
538	843
1542	0
1095	602
1283	0
874	0
553	583
